# Supplementary material for: A Low Level of NaCl Stimulates Plant Growth by Improving Carbon and Sulfur Assimilation in Arabidopsis thaliana
Source: MDPI journal article supplement (doi:10.3390/plants10102138), 2021-10-09
Supplement: s1 [file s1]

**Supplemental Table S1 Salt concentrations in the liquid culture medium**

| Compound                                                            | Molecular Weight | Concentration in the stock solution (x 200) |         | Concentration in the medium |
|---------------------------------------------------------------------|------------------|---------------------------------------------|---------|-----------------------------|
|                                                                     |                  | mM                                          | g/L     | mM                          |
| $\text{NaH}_2\text{PO}_4 \cdot 2\text{H}_2\text{O}$                 | 156.01           | 300                                         | 46.8    | 1.5                         |
| $\text{Na}_2\text{HPO}_4 \cdot 12\text{H}_2\text{O}$                | 358.14           | 50                                          | 17.9    | 0.25                        |
| $\text{Ca}(\text{NO}_3)_2 \cdot 4\text{H}_2\text{O}$                | 236.15           | 400                                         | 94.5    | 2                           |
| $\text{KNO}_3$                                                      | 101.1            | 600                                         | 60.7    | 3                           |
| $\text{MgSO}_4 \cdot 7\text{H}_2\text{O}$                           | 246.47           | 300                                         | 74.0    | 1.5                         |
| $\text{Na}_2 \cdot \text{EDTA} \cdot 2\text{H}_2\text{O}$           | 372.24           | 11.7                                        | 4.35    | 0.0585                      |
| $\text{NaFeEDTA} \cdot 3\text{H}_2\text{O}$ (FeIII)                 | 385.06           | 1.9                                         | 0.732   | 0.00950                     |
| $\text{MnCl}_2 \cdot 4\text{H}_2\text{O}$                           | 197.9            | 2.06                                        | 0.408   | 0.0103                      |
| $\text{ZnCl}_2$                                                     | 136.29           | 0.202                                       | 0.0275  | 0.00101                     |
| $\text{CuCl}_2 \cdot 2\text{H}_2\text{O}$                           | 170.48           | 0.192                                       | 0.0327  | 0.000960                    |
| $\text{H}_3\text{BO}_3$                                             | 61.83            | 6                                           | 0.371   | 0.0300                      |
| $(\text{NH}_4)_6\text{Mo}_7\text{O}_{24} \cdot 4\text{H}_2\text{O}$ | 1235.86          | 0.0048                                      | 0.00593 | 0.0000240                   |
| $\text{CoCl}_2 \cdot 6\text{H}_2\text{O}$                           | 237.93           | 0.026                                       | 0.00619 | 0.000130                    |

**Supplemental Table S2**  
**Element concentrations in the liquid culture medium**

| Element | Concentration in<br>the stock solution (x 200) | Concentration in<br>the medium |
|---------|------------------------------------------------|--------------------------------|
|         | mM                                             | mM                             |
| K       | 600                                            | 3                              |
| Na      | 423                                            | 2.12                           |
| Ca      | 400                                            | 2                              |
| P       | 350                                            | 1.75                           |
| S       | 300                                            | 1.5                            |
| N       | 2000                                           | 10                             |
| Mg      | 300                                            | 1.5                            |
| B       | 6                                              | 0.03                           |
| Cl      | 4.96                                           | 0.0248                         |
| Mn      | 2.06                                           | 0.0103                         |
| Fe      | 1.74                                           | 0.00870                        |
| Zn      | 0.202                                          | 0.00101                        |
| Cu      | 0.192                                          | 0.000959                       |
| Mo      | 0.0336                                         | 0.000168                       |
| Co      | 0.0260                                         | 0.000130                       |

**Supplemental Table S3 Primers used for quantitative RT-PCR**

| Category             | Gene name       | AGI       | Forward primer 5'--3' |                           | Reverse primer 5'--3' |                          | Reference |
|----------------------|-----------------|-----------|-----------------------|---------------------------|-----------------------|--------------------------|-----------|
| Salt stress response | <i>NHX1</i>     | AT5G27150 | NHX1_qF               | CTACCTATTACCGCACCAGAACG   | NHX1_qR               | CTCAATGAACGAGTCTTGGTCC   | 48        |
|                      | <i>SLAH1</i>    | AT1G62280 | SLAH1_qF              | TCTTCAATGTCCTGGTCTG       | SLAH1_qR              | ATTGCTGTTTGCTGCTGTC      | 49        |
|                      | <i>SULTR1;2</i> | AT1G78000 | SULTR1;2_qF           | GGATCCAGAGATGGCTACATGA    | SULTR1;2_qR           | TCGATGTCCGTAAACAGGTGAC   | 50        |
| S assimilation       | <i>APR_2</i>    | AT1G62180 | APR_2_qf              | GCTTCAACTCTAATTGCTCCTGAAG | APR_2_qR              | CAATGCAACATCTTCAGCTCCACT |           |
|                      | <i>APR_3</i>    | AT4G21990 | APR_3_qF              | GGAATCCATTGTTGCTTCTGAGGT  | APR_3_qR              | CAGAGCAACATCTTCAGCTCCACT |           |

**Supplemental Table S4 Salt composition of Hoagland's medium**

| Component                                               | Concentration of stock solution (mM) | Grams of salts (g) | Volume of stock solution per liter (ml) |
|---------------------------------------------------------|--------------------------------------|--------------------|-----------------------------------------|
| KNO <sub>3</sub>                                        | 1000                                 | 101.1              | 6                                       |
| Ca(NO <sub>3</sub> ) <sub>2</sub> ·4H <sub>2</sub> O    | 1000                                 | 236.16             | 4                                       |
| NH <sub>4</sub> H <sub>2</sub> PO <sub>4</sub>          | 1000                                 | 115.08             | 2                                       |
| MgSO <sub>4</sub> ·7H <sub>2</sub> O                    | 1000                                 | 246.48             | 1                                       |
| KCl                                                     | 25                                   | 1.864              | 2                                       |
| H <sub>3</sub> BO <sub>3</sub>                          | 12.5                                 | 0.773              | 2                                       |
| MnSO <sub>4</sub> ·H <sub>2</sub> O                     | 1                                    | 0.169              | 2                                       |
| ZnSO <sub>4</sub> ·7H <sub>2</sub> O                    | 1                                    | 0.288              | 2                                       |
| CuSO <sub>4</sub> ·5H <sub>2</sub> O                    | 0.25                                 | 0.062              | 2                                       |
| H <sub>2</sub> MoO <sub>4</sub> (85% MoO <sub>3</sub> ) | 0.25                                 | 0.04               | 2                                       |
| *Na·Fe·DTPA (10% Fe)                                    | 53.7                                 | 30                 | 0.3-1                                   |

\*Note: This should be avoided in salinity stress treatment imposition.
